1 **Copper intoxication in group B *Streptococcus* triggers transcriptional activation**  
2 **of the *cop* operon that contributes to enhanced virulence during acute infection**

3 Matthew J. Sullivan<sup>a</sup>, Kelvin G. K. Goh<sup>a</sup>, Dean Gosling<sup>a,†</sup>, Lahiru Katupitiya<sup>a</sup>, and Glen  
4 C. Ulett<sup>a, #</sup>

5  
6 <sup>a</sup>School of Medical Sciences, and Menzies Health Institute Queensland, Griffith  
7 University, Gold Coast, Queensland, Australia 4222.

8 <sup>†</sup>Current address: Pathology Queensland, Health Support Queensland, Department of  
9 Health, Queensland Government, Southport, Queensland, Australia 4215.

10

11 **Article Type:** Research article

12 **Running Title:** Copper stress in group B *Streptococcus*

13 **Word count:** 4960, 198 (abstract)

14 **Display Items:** 7 Figures, 2 Tables (plus 1 Supplementary Table, 1 Supplementary Fig)

15 **Conflict Statement:** All the authors do not have a commercial or other association that  
16 might pose a competing financial interest in relation to the work described.

17

18 # Correspondence and offprint requests: Professor Glen C. Ulett, School of Pharmacy  
19 and Medical Science, and Menzies Health Institute Queensland, Griffith Health Centre,

20 Griffith University, Gold Coast, Queensland 4222, Email: [g.ulett@griffith.edu.au](mailto:g.ulett@griffith.edu.au), T: +61

21 7 56780765, F: +61 7 55632236

22 **Abstract**

23 Bacteria require Copper (Cu) as an essential trace element to support cell processes;  
24 however, excess Cu can intoxicate bacteria. Here, we characterize the *cop* operon in  
25 group B *Streptococcus* (GBS), and establish its role in evasion of Cu intoxication and  
26 the response to Cu stress on virulence. Growth of GBS mutants deficient in either the  
27 *copA* Cu exporter, or the *copY* repressor, were severely compromised in Cu-stress  
28 conditions. GBS survival of Cu stress reflected a mechanism of CopY activation of the  
29 CopA efflux system. However, neither mutant was attenuated for intracellular survival in  
30 macrophages. Analysis of global transcriptional responses to Cu by RNA-sequencing  
31 revealed a stress signature encompassing homeostasis of multiple metals. Genes  
32 induced by Cu stress included putative metal transporters for manganese import,  
33 whereas a system for iron export was repressed. In addition, *copA* promoted the ability  
34 of GBS to colonize the blood, liver and spleen of mice following disseminated infection.  
35 Together, these findings show that GBS *copA* mediates resistance to Cu intoxication,  
36 via regulation by the Cu-sensing transcriptional repressor, *copY*. Cu stress responses in  
37 GBS reflect a transcriptional signature that heightens virulence and represents an  
38 important part of the bacteria's ability to survive in different environments.

39

40 **Keywords:** Metallobiology; group B *Streptococcus*; Metal ions; Copper efflux; Bacterial  
41 pathogenesis

## 42 **Introduction**

43 Copper (Cu) is the most reactive of the biologically-relevant first-row *d*-block transition  
44 metals. It can readily displace other metals, including Zinc (Zn), Nickel (Ni), Cobalt (Co),  
45 Iron (Fe) and Manganese (Mn) from metalloproteins in which these are bound (1, 2). In  
46 cells across all Kingdoms of life, Cu-dependent enzymes are pivotal to many essential  
47 processes that underpin physiologic biochemical reactions, owing to its ability to redox  
48 cycle between Cu(I) and Cu(II) states (3). When present in excess, however, Cu is  
49 hazardous to cellular processes and macromolecules due to effects of localized free-  
50 radical damage (4). A key role for Cu in bacterial cell biology encompasses the host-  
51 pathogen interface where a balance between Cu usage and avoidance of Cu  
52 intoxication resulting from host antimicrobial responses must be attained for bacteria to  
53 survive, as reviewed elsewhere (5). At this interface, human immune cells can mobilize  
54 Cu in a defence response to infection that culminates in exposure of intracellular  
55 bacteria to antimicrobial levels of Cu that kill the invading pathogen (6-9). Thus,  
56 bacterial responses to Cu stress and mechanisms of resistance to metal-ion intoxication  
57 have emerged as important facets of bacterial disease pathogenesis (10).

58

59 There are several mechanisms that enable bacteria to tolerate excess extracellular Cu,  
60 and these have been characterized in several pathogenic species. These mechanisms,  
61 which represent survival strategies against Cu intoxication (10) typically involve Cu-  
62 transporting P-type ATPases, exemplified by CopA, which detoxify Cu by exporting it  
63 from the bacterial cytosol (11-13). This mechanism has been described in gram-

64 negative and gram-positive bacteria, and among *Streptococcaceae* (14-16), including  
65 pneumococci and *Streptococcus pyogenes* (17).

66

67 An opportunistic streptococcal pathogen of humans and animals for which resistance to  
68 excess extracellular Cu has not been described is *Streptococcus agalactiae*, also known  
69 as group B streptococcus (GBS). This organism, unlike other *Streptococcaceae*, is  
70 associated with a comparatively broad host-range that encompasses humans, cattle  
71 and fish (18). In humans, GBS is a major cause of invasive infection in infants <3  
72 months of age (19), and causes a more diverse range of disease aetiologies compared  
73 to other streptococci, including meningitis, pneumonia, skin and soft-tissue infections,  
74 sepsis, arthritis, osteomyelitis, urinary tract infection, and endocarditis (19). GBS has a  
75 several virulence factors that enable survival in cytotoxic environments, such as acid  
76 stress, oxidative stress, and during host colonization, as reviewed elsewhere (20).  
77 Cellular tolerance to Cu stress and mechanisms of responding to and surviving Cu  
78 intoxication have not been defined in GBS.

79

80 In this study, we characterise a system that enables Cu efflux in GBS, encompassing a  
81 *copA*-homologue, which we show mediates control of Cu efflux in the bacteria. We  
82 show this system affects survival, growth and virulence of GBS in the mammalian host.

83

## 84 **Results**

### 85 ***Transcriptomic profiling of GBS responses to extracellular Cu***

86 To dissect the global response of GBS to extracellular Cu stress we performed RNA  
87 sequencing (RNASeq) to define the complete primary transcriptional response to Cu.  
88 RNASeq analysis of mid-log phase cells of GBS strain 874391 exposed to 0.5 mM Cu  
89 (a sub-inhibitory level; below) compared to non-exposed controls revealed a surprisingly  
90 modest Cu-responsive transcriptome. The response comprised 18 transcriptional  
91 responses, defined as significant based on  $-2 \leq FC \leq 2$  (FDR < 0.05,  $n=4$  biological  
92 replicates), of 11 up-regulated transcripts and 7 down-regulated transcripts (Figure 1,  
93 Table 1). The most significantly up-regulated were homologues of the *copY-copA-copZ*  
94 gene cluster (3.6-4.0-fold), which encode the putative CopY (Cu-binding transcriptional  
95 repressor), CopA (P-type ATPase Cu-efflux system) and CopZ (Cu-chaperone) proteins.  
96 To validate the expression levels of selected targets identified in RNASeq, we targeted  
97 *pcl1*, *hvgA* and *copY* in qRT-PCR assays, confirming near-identical fold-change values  
98 to RNASeq analyses (Figure 1B). The products of *copY*, *copA* and *copZ* in GBS (Figure  
99 2A) are moderately conserved compared to other Lactobacillales, including *S. mutans*,  
100 *S. thermophilus*, *S. pyogenes*, *S. pneumoniae*, and *Enterococcus* (Figure 2B, ranked by  
101 CopA similarity) for which a homologous Cu management system is defined (9, 13-15).  
102 Together, these findings provide transcriptional and comparative insights that support a  
103 proposed model of Cu efflux in GBS (Figure 2C).

104

105 In addition to *copYAZ*, GBS up-regulated putative metal transporters for Mn import  
106 (*mtsABC*, *mntH2*), and down-regulated an iron (Fe) export system (*fetAB*; Figure 1,

107 Table 1). In addition, we detected significant down-regulation of *pcl1*, that encodes a  
108 putative membrane protein, and the gene for hypervirulence-associated factor, *hvgA*.

109

### 110 ***Roles of copA and copY in Cu-resistance in GBS***

111 To provide molecular functional characterization of two of the major elements of the Cu-  
112 responsive transcriptome in GBS, we targeted *copA* and *copY* by generating isogenic  
113 deletion mutants and performing comparative growth assays with the WT. In a nutrient-  
114 rich medium (Todd Hewitt Broth; THB) supplemented with increasing amounts of Cu,  
115 we detected no significant attenuation effect of high Cu levels (up to 1.5 mM) on the  
116 growth of WT GBS; the lag phases, growth rates, and final biomass yields were  
117 equivalent for the WT exposed to different levels of Cu (Figure 3). In contrast,  $\Delta copA$   
118 GBS exhibited a major attenuation for growth in conditions of Cu stress  $\geq 1$  mM.  
119 Deletion of *copY*, encoding a putative Cu-dependent repressor of *copA*, had no effect  
120 on the growth rate or lag phase in THB supplement with Cu (Figure 3). Taken together,  
121 these data establish that *copA* confers cellular resistance to Cu stress in GBS in a  
122 manner that supports bacterial growth in nutritive conditions.

123

### 124 ***Temporal- and Concentration-Dependent Bactericidal effects of Cu towards GBS***

125 To more precisely define the toxicity effects of Cu towards GBS, we performed time-kill  
126 curves using  $1-5 \times 10^6$  CFU/mL exposed to Cu concentrations ranging between 50  $\mu$ M  
127 and 1 mM. We used a minimal Chemically-Defined Medium (CDM) in the context of prior  
128 studies of antibacterial activity in minimal media (21, 22), that antibacterial activity in such  
129 assays can be strongly dependent on the culture media (23, 24), and to minimize cell-

130 protective effects that can result from some buffering agents, such as glutathione (15).  
131 We found potent killing effects that depended on both concentration and time with  $\geq 0.5$   
132 mM Cu significantly killing WT GBS after 6h of exposure (Figure 4, WT); after 24h, there  
133 was a ~230-fold reduction in CFU/mL at 0.5 mM Cu (0 mM Cu = 5.6 Log<sub>10</sub> CFU/mL, 0.5  
134 mM CFU/mL = 3.2 Log<sub>10</sub> CFU/mL), and no viable GBS remained in cultures exposure to  
135 1 mM Cu. The  $\Delta copA$  strain was significantly more susceptible to Cu toxicity compared  
136 to the WT; Cu levels above  $\geq 0.5$  mM significantly reduced the number of viable  $\Delta copA$   
137 GBS beginning as early as 1h exposure (Figure 4,  $\Delta copA$ ); the degree of bacterial killing  
138 was dramatic at the 24h timepoint for  $\geq 0.5$  mM Cu (Figure 4). Complementation of the  
139 *copA* mutation *in trans* restored the phenotype to WT levels of growth (Supplementary  
140 Figure S1). Interestingly, at the 6h timepoint, high Cu ( $\geq 0.5$  mM) did not affect viability  
141 of  $\Delta copY$  GBS, compared to the WT strain (Figure 4,  $\Delta copY$ ), a hyper-resistance  
142 phenotype that was not apparent at the 24 h timepoint. Together, these findings are  
143 consistent with a role for CopA in resisting Cu stress and CopY as a repressor of Cu  
144 resistance.

145

#### 146 ***Regulation of Cu efflux by CopY, and accumulation of metals during Cu stress***

147 We next sought to identify regulatory mechanisms controlling the Cu-response in GBS  
148 at the genetic level. The capacity of Cu stress to induce expression of *copA* for Cu  
149 export was examined by analyzing *copA* expression by qRT-PCR in GBS exposed to Cu  
150 Cu concentrations ranging from 0.25-1.5 mM Cu in THB. GBS significantly upregulated  
151 *copA* in response to Cu (3.7-fold – 14.2-fold) in a manner that was titratable with the Cu  
152 concentration (Figure 5A). To ascertain the role of CopY as a putative Cu-responsive

153 repressor of *copA* expression in GBS, we quantified *copA* mRNA transcripts in the  
154  $\Delta copY$  mutant exposed to 0.5 mM Cu. This level of Cu was carefully chosen as sub-  
155 inhibitory to enable comparisons independent of metabolic state and therefore limiting  
156 any potential bias from possible discordant Cu stress between WT and mutants with  
157 varied resistance phenotypes. Deletion of *copY* impacted final biomass yield of cultures  
158 compared to WT (Figure 5B), and resulted in severe de-regulation of *copA* expression,  
159 causing a  $\sim 207 \pm 45$ -fold increase of *copA* transcripts in the *copY* background (Figure  
160 5C). Thus, *copA* responds transcriptionally to extracellular Cu, and GBS *copY* functions  
161 to repress *copA* in the absence of Cu.

162

163 To examine the impact of *copA* and *copY* mutations on accumulation of Cu within the  
164 cell we used the equivalent conditions per RNASeq and qPCR assays, exposing GBS  
165 to 0.5 mM Cu in THB and measuring total Cu content of cells compared to non-exposed  
166 controls. Inductively coupled optical emission spectroscopy (ICP-OES) demonstrated  
167 that standard THB contained  $0.2 \pm 0.08$   $\mu\text{M}$  Cu, reflecting trace amounts in the medium.  
168 In the absence of supplemental Cu, WT GBS limited intracellular Cu content such that  
169 only  $0.8 \pm 0.1$   $\mu\text{g Cu. g dry weight}^{-1}$  were detected in cultures grown in THB. However,  
170 exposure of WT GBS to 0.5 mM Cu resulted in a dramatic increase in intracellular Cu to  
171  $31.9 \pm 3.1$   $\mu\text{g Cu. g dry weight}^{-1}$  (Figure 5D). Strikingly,  $\Delta copY$  GBS exhibited significantly  
172 less cellular Cu upon exposure to Cu ( $6.7 \pm 0.4$   $\mu\text{g Cu. g dry weight}^{-1}$ ), consistent with the  
173 observation that transcription of the Cu-exporter CopA is significantly elevated in this  
174 mutant. In addition, we noted massive accumulation of cellular Cu in the  $\Delta copA$  strain  
175 ( $109.6 \pm 1.9$   $\mu\text{g Cu. g dry weight}^{-1}$ ), confirming a Cu-efflux role for *copA*. Interestingly, we



176 noted no changes in other metals, including Zn, Mn and Fe (data not shown) in WT  
177 versus  $\Delta copA$  GBS, consistent with a report in *S. pneumoniae* (14).

178

### 179 ***Role of CopA in macrophage killing of GBS***

180 To examine whether the CopA Cu efflux system in GBS supports survival of the bacteria  
181 in phagocytes we performed antibiotic protection assays with murine macrophages and  
182 human monocyte-derived macrophage-like cells. Macrophages were infected with WT  
183 or  $\Delta copA$  GBS for 1h, and antibiotics were added to kill extracellular bacteria. Viable  
184 intracellular GBS were quantified at 1h post-antibiotic addition, and at 24h and 48h.  
185 These assays demonstrated significant reduction in the numbers of viable GBS over the  
186 time course (24 to 48h) in both human and murine macrophages; however, there were  
187 no significant differences detected between the numbers of WT and  $\Delta copA$  GBS  
188 recovered from macrophages at any time point (Figure 6). Thus, under these conditions,  
189 *copA* does not contribute to the intracellular survival of GBS in macrophages.

190

### 191 ***GBS CopA contributes to virulence in vivo***

192 To examine the contribution of Cu efflux to GBS virulence, we used a murine model of  
193 disseminated infection (25). In mice challenged with  $10^7$  GBS, we detected significantly  
194 fewer  $\Delta copA$  mutant in the liver (median of 3.5 vs 4.2  $\log_{10}$  CFU.g tissue<sup>-1</sup>; P= 0.005),  
195 spleen (median of 3.8 vs 4.1  $\log_{10}$  CFU.g tissue<sup>-1</sup> P= 0.013) and blood (median of 1.4 vs  
196 1.9  $\log_{10}$  CFU.mL<sup>-1</sup>; P= 0.044) compared to the WT at 24h post-inoculation (Figure 7).  
197 No differences were observed between counts of the WT and  $\Delta copA$  mutant in the  
198 brain, heart, lungs, or kidneys (data not shown). These data support a modest but

199 statistically significant role for cellular management of Cu via *copA* in supporting

200 disseminated infection *in vivo*.

201

## 202 **Materials and Methods**

## 203 **Bacterial strains, plasmids and growth conditions**

204 GBS, *E. coli* and plasmids used are listed in Table 2. GBS was routinely grown in Todd-  
205 Hewitt Broth (THB) or on TH agar (1.5% w/v). *E. coli* was grown in Lysogeny Broth (LB)  
206 or on LB agar. Media were supplemented with antibiotics (spectinomycin (Sp)  
207 100µg/mL; chloramphenicol (Cm) 10 µg/mL), as indicated. Growth assays used 200µL  
208 culture volumes in 96-well plates (Greiner) sealed using Breathe-Easy® membranes  
209 (Sigma Aldrich) and measured attenuation (*D*, at 600nm) using a ClarioSTAR  
210 multimode plate reader (BMG Labtech) in Well Scan mode using a 3mm 5x5 scan  
211 matrix with 5 flashes per scan point and path length correction of 5.88mm, with agitation  
212 at 300rpm and recordings taken every 30min. Media for growth assays were THB and a  
213 modified Chemically-Defined Medium (CDM) (26) (with 1g/L glucose, 0.11g/L pyruvate  
214 and 50µg/L L-cysteine), supplemented with Cu (supplied as CuSO<sub>4</sub>) as indicated. For  
215 attenuation baseline correction, control wells without bacteria were included for Cu in  
216 media alone.

## 217 **DNA extraction and genetic modification of GBS**

218 Plasmid DNA was isolated using miniprep kits (QIAGEN), with modifications for GBS as  
219 described elsewhere (27). Deletions in *copA* (CHF17\_00507 / CHF17\_RS02570) and  
220 *copY* (CHF17\_00506 / CHF17\_RS02565) were constructed by markerless allelic  
221 exchange using pHY304aad9 as described previously (28). Plasmids and primers are  
222 listed in Table 2 and Supplementary Table S1, respectively. Mutants were validated by  
223 PCR using primers external to the mutation site and DNA sequencing.

## 224 **RNA extraction, qRT-PCR**

225 For Cu exposure experiments, 1mL overnight THB cultures were back-diluted 1/100 in  
226 100mL of THB (prewarmed at 37°C in 250mL Erlenmeyer flasks) supplemented with  
227 0.25, 0.5, 1.0 or 1.5mM Cu. Cultures were grown shaking (200rpm) at 37°C; after  
228 exactly 2.5h, 10-50mL volumes containing approximately 500 million mid-log bacteria  
229 were harvested; RNA was preserved and isolated as described previously (29). RNA  
230 quality was analysed by RNA LabChip using GX Touch (Perkin Elmer). RNA (1000ng)  
231 was reverse-transcribed using Superscript IV according to manufacturer's instructions  
232 (Life Technologies) and cDNA was diluted 1:50 in water prior to qPCR. Primers  
233 (Supplementary Table S1) were designed using Primer3 Plus (30, 31) to quantify  
234 transcripts using Universal SYBR Green Supermix (Bio-Rad) using a Quantstudio 6  
235 Flex (Applied Biosystems) system in accordance with MIQE guidelines (32). Standard  
236 curves were generated using five-point serial dilutions of genomic DNA (5-fold) from WT  
237 GBS 874391 (33). Expression ratios were calculated using  $C_T$  values and primer  
238 efficiencies as described elsewhere (34) using *dnaN*, encoding DNA polymerase III  $\beta$ -  
239 subunit as housekeeper.

#### 240 **Whole bacterial cell metal content determination**

241 Metal content in cells was determined as described (35) with minor modifications.  
242 Cultures were prepared essentially as described for *RNA extraction, qRTPCR* with the  
243 following modifications; THB medium was supplemented with 0.5 mM  $\text{CuSO}_4$  or not  
244 supplemented (Ctrl), and following exposure for 2.5h, bacteria were harvested by  
245 centrifugation at 4122 x g at 4°C. Cell pellets were washed 3 times in PBS + 5mM  
246 EDTA to remove extracellular metals, followed by 3 washes in PBS. Pelleted cells were  
247 dried overnight at 80°C and resuspended in 1mL of 32.5% nitric acid and incubated at

248 95°C for 1h. The metal ion containing supernatant was collected by centrifugation  
249 (14,000 x g, 30min) and diluted to a final concentration of 3.25% nitric acid for metal  
250 content determination using inductively coupled plasma optical emission spectroscopy  
251 (ICP-OES). ICP-OES was carried out on an Agilent 720 ICP-OES with axial torch,  
252 OneNeb concentric nebulizer and Agilent single pass glass cyclone spray chamber. The  
253 power was 1.4kW with 0.75L/min nebulizer gas, 15L/min plasma gas and 1.5L/min  
254 auxiliary gas flow. Cu was analyzed at 324.75nm, Zn at 213.85nm, Fe at 259.94nm and  
255 Mn at 257.61nm with detection limits at <1.1ppm. The final quantity of each metal was  
256 normalised using dry weight biomass of the cell pellet prior to nitric acid digestion,  
257 expressed as  $\mu\text{g.g}^{-1}$  dry weight. Baseline concentrations were determined to be  $0.2 \pm$   
258  $0.08 \mu\text{M}$  Cu in THB medium, and  $40 \pm 4 \text{ nM}$  Cu in CDM medium from at least three  
259 independent assays.

## 260 **RNA sequencing and bioinformatics**

261 Cultures were prepared as described above for *RNA extraction*, *qRTPCR* to compare  
262 mid-log phase cells grown in THB + 0.5 mM Cu to THB without added Cu. RNase-free  
263 DNase-treated RNA that passed Bioanalyzer 2100 (Agilent) analysis was used for RNA  
264 sequencing (RNA-seq) using the Illumina NextSeq 500 platform. We used TruSeq  
265 library generation kits (Illumina, San Diego, California). Library construction consisted of  
266 random fragmentation of the poly(A) mRNA, followed by cDNA production using random  
267 primers. The ends of the cDNA were repaired and A-tailed, and adaptors were ligated  
268 for indexing (with up to 12 different barcodes per lane) during the sequencing runs. The  
269 cDNA libraries were quantitated using qPCR in a Roche LightCycler 480 with the Kapa  
270 Biosystems kit (Kapa Biosystems, Woburn, Massachusetts) prior to cluster generation.

271 Clusters were generated to yield approximately 725K–825K clusters/mm<sup>2</sup>. Cluster  
272 density and quality was determined during the run after the first base addition  
273 parameters were assessed. We ran paired-end 2 × 75–bp sequencing runs to align the  
274 cDNA sequences to the reference genome. For data preprocessing and bioinformatics,  
275 STAR (version 2.7.3a) was used to align the raw RNA sequencing fastq reads to the  
276 WT GBS 874391 reference genome (33). HTSeq-count, version 0.11.1, was used to  
277 estimate transcript abundances (36). DESeq2 was then used to normalized and test for  
278 differential expression and regulation. Genes that met certain criteria (i.e. fold change of  
279 > ±2.0, q value (false discovery rate, FDR of <0.05) were accepted as significantly  
280 altered (37). Raw and processed data were deposited in Gene Expression Omnibus  
281 (accession no. GSE161127).

## 282 **Mammalian cell culture**

283 J774A.1 murine macrophages or U937 human monocyte-derived macrophages (MDMs)  
284 were grown in RPMI and seeded (10<sup>5</sup>) into the wells of a 96-well tissue culture-treated  
285 plate (Falcon) essentially as described elsewhere (38, 39), except that U937 MDMs  
286 were differentiated by exposure to 30ng/mL phorbol 12-myristate 13-acetate (PMA) for  
287 48h and cells subsequently rested in media without PMA for 72h to enhance  
288 morphological and phenotypic markers of MDMs (40). A multiplicity of infection (MOI) of  
289 100 bacteria: macrophage for 1h was used in RPMI without antibiotics. Non-adherent  
290 bacteria were removed by five washes of 200µL PBS using a Well Wash Versa (Thermo  
291 Scientific). RPMI containing 250U/mL penicillin, streptomycin (Gibco) and 50µg/mL  
292 gentamicin (Sigma-Aldrich) were used for antibiotic protection assays to kill extracellular  
293 bacteria as described previously by incubating for 1h at 37°C in 5% CO<sub>2</sub> (39). Samples

294 were processed after 1h (time zero), 24h or 48h after infection, monolayers were  
295 washed five times with 200 $\mu$ L PBS and lysed by brief exposure to 50 $\mu$ L of 2% trypsin  
296 and 0.02% Triton-X-100 (10min) prior to dilution with 150 $\mu$ L PBS and estimation of  
297 CFU/mL by serial dilution and plate counts on agar. Relative CFU (rCFU) was  
298 determined as described previously (41) as follows; rCFU= CFU.mL<sup>-1</sup> at 24h or 48h /  
299 CFU.mL<sup>-1</sup> at time zero.

### 300 **Animals and Ethics statement**

301 Virulence was tested using a mouse model of disseminated infection based on  
302 intravenous challenge with 10<sup>7</sup> GBS (WT or  $\Delta$ copA) as described elsewhere (25). This  
303 study was carried out in accordance with the guidelines of the Australian National  
304 Health and Medical Research Council. The Griffith University Animal Ethics Committee  
305 reviewed and approved all experimental protocols for animal usage according to the  
306 guidelines of the National Health and Medical Research Council (approval:  
307 MSC/01/18/AEC).

### 308 **Statistical methods**

309 All statistical analyses used GraphPad Prism V8 and are defined in respective Figure  
310 Legends. Statistical significance was accepted at P values of  $\leq 0.05$ .

311



## 312 **Discussion**

313 Transcriptional and cellular responses of bacterial pathogens to metal ions including Cu  
314 can influence host-pathogen interactions and thereby play a role in disease pathogenesis  
315 (4). The role Cu homeostasis and detoxification in the biology of GBS have not hitherto  
316 been characterized, and no reports of a Cu stress response in this important human and  
317 animal pathogen are published. The principal finding of this study is the establishment  
318 of a transcriptional and cellular connection between the response to Cu stress in GBS  
319 and survival of the bacteria in conditions of Cu toxicity; this connection is mediated  
320 through *copA* and controlled through *copY*, and enables the bacteria to resist killing via  
321 Cu-mediated intoxication. Additionally, this study establishes that the connection  
322 between Cu stress responses in GBS and bacterial survival promotes virulence in the  
323 host during systemic, disseminated infection. The new insights into gene function in  
324 GBS viewed through the lens of the Cu stress transcriptome, combined with the findings  
325 of enhanced virulence elucidate molecular mechanisms that underpin GBS survival of  
326 intoxicating conditions, including those likely to be encountered in the host.

327

328 The transcriptional remodelling that occurs in GBS in response to Cu stress, as defined  
329 in this study on a global level, comprises an intriguingly constrained subset of genes.  
330 These findings indicate a tightly controlled system of transcriptional responses to Cu in  
331 GBS. Interestingly, equivalent low numbers of target genes were identified in previous  
332 transcriptional analyses of other streptococci exposed to Cu stress (14-16). Our findings  
333 are consistent with these prior reports, and support the notion that these transcriptional  
334 responses function in housekeeping or homeostasis to set a low limit of Cu availability

335 in the cytoplasm (15). In GBS, *copA* is among the most strongly activated genes in the  
336 transcriptional response to Cu stress, and the mutational analysis performed in this  
337 study shows that *copA* is crucial for the bacteria to attain an essential Cu efflux response  
338 during Cu stress. However, *copA* is only one of an assembly of genes engaged by GBS  
339 during Cu stress and it is likely that other genes in the transcriptome contribute to Cu  
340 detoxification via additional means. For example, we detected up-regulation of putative  
341 metal transporters for Mn import (*mtsABC*, *mntH2*) along with concurrent down-  
342 regulation of a system that encodes Fe export machinery (*fetAB*). These transcriptional  
343 insights are interesting because they hint at additional stress response mechanisms that  
344 occur during Cu stress in GBS, which extend beyond CopA and which need elucidation.

345  
346 Transcription of metal ion-import and export genes, including those above-mentioned, is  
347 typically controlled by metal-dependent regulatory proteins termed metalloregulators that  
348 sense metal ion-bioavailability and work to maintain cellular metal homeostasis (42). In  
349 our study, we detected no major changes in the expression of genes predicted to encode  
350 metalloregulators, such as for transport of Mn (*mntR/mtsR*), Fe (*fur*), Zn (*adcR/sczA*) and  
351 for the sensing of peroxide (*perR*) in GBS undergoing Cu stress (42, 43). It would be of  
352 interest to elucidate whether such regulators undergo mis-metallation in GBS during Cu  
353 stress, which might occur due to excess Cu likely outcompeting Mn and Fe for binding  
354 sites in proteins; however, precisely if and how metalloregulators might respond to mis-  
355 metallation in GBS, if this actually occurs, will need to be elucidated by further study.

356

357 A previous study of *S. pneumoniae* reported a role for Mn in rescuing Cu toxicity in the  
358 bacteria (14). The authors suggested that the mechanism of rescue related to  
359 modulated expression of aerobic and anaerobic dNTP synthesis pathways, encoded by  
360 *nrdF* and *nrdD*, respectively. If we consider that Mn rescues Cu-mediated inhibition of  
361 dNTP synthesis, it is conceivable that Mn import may be linked to Cu stress in GBS.  
362 Our transcriptional assays of WT GBS showed no response of *nrdD* expression to Cu  
363 stress, consistent with the findings of Johnson *et al.* Nevertheless, we observed a highly  
364 statistically significant, but modestly up-regulated response of the *nrdFIA* genes,  
365 encoding the aerobic dNTP synthesis system (1.7-fold, FDR < 0.001), to Cu stress (data  
366 not shown). The role of *nrdFIA* genes in the GBS response to Cu stress requires further  
367 study, noting that NrdD encodes an iron-containing enzyme, whereas NrdF encodes a  
368 Mn-dependent pathway, further hinting at a role for Mn in the GBS Cu stress response.  
369  
370 In *S. pyogenes*, Mn uptake is facilitated by *mtsABC* and is protective against peroxide  
371 induced stress (43). Expression of *mtsABC* is up-regulated by Mn deficiency, and is  
372 controlled by the MtsR regulator (43, 44). Mn import and Fe efflux are co-ordinated in  
373 order to control the metalation of superoxide dismutase (43), which can use Mn or Fe at  
374 its catalytic site in streptococci; noting that Mn uptake can be disrupted by Zn (35).  
375 Recently, the Cu-sensing transcription factor Mac1p in *Candida* was shown to regulate  
376 the cells response to Cu starvation by controlling Cu import, and control reactive oxygen  
377 species homeostasis by repressing a Cu-containing superoxide dismutase and inducing  
378 Mn-containing SOD3 (45). A system for the dual import of Mn and Fe in GBS is  
379 encoded by *mntH* that is regulated by pH (46). In some strains of GBS, including the

380 hypervirulent ST17 lineage used in this study, two homologues of MntH exist, encoded  
381 by *mntH* and *mntH2*. This study demonstrates up-regulation of *mntH2*, but not *mntH*, in  
382 response to Cu, however the role of *mntH2* is undefined in GBS. We also note that  
383 *mtsABC* and *mntH2* are also up-regulated in concert with down-regulation of Fe-  
384 transporting *fetAB* in response to Zn stress in GBS (47). Together, our data indicate that  
385 modulation of *mtsABC*, *mntH2* and *fetAB* expression forms parts of a transcriptional  
386 signature of GBS to Zn stress.

387

388 It is notable that modulation of putative Mn (*mtsABC*) and Fe (*fetAB*) transporters, as  
389 well as other proteins predicted to localise to the membrane (*pcl1*) or cell surface (*hvgA*)  
390 in GBS in response to Cu stress takes place in the absence of altered cellular Mn or Fe  
391 content. This leads us to suggest that examining the roles of targets identified in this  
392 study in the context of Cu transport is needed in concert with other metals (e.g., Mn).  
393 Indeed, the 'dearth of information' on precisely how Cu is transported into bacterial cells  
394 from the external environment represents a central mystery for Cu trafficking in bacteria  
395 (48). Perhaps a system for Cu import is inversely regulated to a *bona fide* Cu export  
396 system, in a fashion that parallels the identified acquisition and efflux systems for Zinc  
397 described in streptococci (49).

398

399 Our assays of bacterial growth *in vitro* in conditions of Cu stress demonstrate that GBS  
400 deficient in *copA* cannot grow as efficiently compared to the WT in conditions of elevated  
401 extracellular Cu. The differences noted in GBS growth between nutritionally rich (THB)  
402 and limited (CDM) media possibly reflect relative quantities of compounds that confer a

403 protective advantage for survival during Cu stress, such as glutathione (15) or other  
404 thiol-containing amino acids that may interact with free Cu ions in solution. Glutathione is  
405 not included in CDM as a separate chemical constituent but the quantities of  
406 methionine, cystine and cysteine are 30, 62.6 and 50 mg.L<sup>-1</sup>. It is also possible that the  
407 levels of Cu utilized in our assays are distinct to those in host niches. Importantly,  
408 however, Cu exposure assays *in vitro* are almost certainly influenced by the compounds  
409 present in the medium that likely affect levels of Cu that become inhibitory (15). Thus,  
410 the Cu exposure assays used in this study are beneficial in establishing *bona fide* gene  
411 function and revealing bacterial responses to a defined stress condition.

412

413 Our analysis of Cu content in GBS cells exposed to Cu stress in defined conditions  
414 shows that GBS maintains low steady-state levels of cellular Cu, in the absence of  
415 excess extracellular Cu. In supplying extracellular Cu in excess, we show the level of  
416 cellular Cu content is increased. Our finding that *copY* functions to repress *copA* in the  
417 absence of Cu is consistent with previous reports in other bacteria (50, 51). Disrupting  
418 the genetic systems for Cu efflux in GBS, via mutation of the CopA exporter, or the  
419 CopY regulator, reveals divergent phenotypes that stem from loss of export or  
420 regulatory function, resulting in accumulation (*copA*<sup>-</sup>) or reduction (*copY*<sup>-</sup>) of cellular Cu.  
421 These phenotypes will be of interest to dissect in terms of the role of CopY in GBS  
422 biology in other models of infection and disease in the future.

423

424 Historically, studies have demonstrated increased Cu levels in the blood of humans  
425 during bacterial infection (52, 53) but most insight into Cu-driven antimicrobial

426 responses is derived from *in vitro* studies of mammalian cells infected experimentally. In  
427 macrophages, bioavailability of Cu correlates with antibacterial activities (54), and Cu ‘hot  
428 spot’ formation mediates antimicrobial responses against intracellular bacteria (7). The  
429 cellular consequences of Cu stress to GBS, which likely encounters such stress in the  
430 host, remains undefined. Our findings based on *in vitro* infection macrophages showed  
431 no attenuation of GBS devoid of CopA in survival in host cells, which was surprising  
432 given the important role of Cu management in survival of other bacteria inside  
433 macrophages (6), and epithelial cells (12). Notably, however, intracellular survival of  
434 *Salmonella* deficient in *cueO*, which encodes an enzyme required for resistance to Cu  
435 ions, was not impaired in murine macrophages in a previous study (55), leading the  
436 authors to suggest multiple host factors are involved in clearance of the bacteria. Our  
437 findings are consistent with these hypotheses. Other researchers have described the  
438 limitations of *in vitro* tissue culture monolayer assays for determining intracellular survival  
439 of bacteria in the context of Cu homeostasis (56).

440  
441 Despite negative findings in macrophage monolayer assays *in vitro*, systemic infection of  
442 mice exposed a connection between the ability of GBS to generate a Cu management  
443 response via CopA and bacterial virulence *in vivo*. Here, *copA* was essential for GBS to  
444 fully colonize and survive in the blood, as well as in other tissues. In demonstrating a  
445 significant attenuation of GBS deficient in CopA to be fully virulent in mice, we suggest  
446 that Cu toxicity may represent a form of stress experienced by the bacteria *in vivo* during  
447 systemic infection. In other bacteria, including *Pseudomonas aeruginosa* and *Listeria*  
448 *monocytogenes*, compromised Cu transport leads to attenuation for colonization in

449 various infection models (56, 57). Attenuation of GBS for colonization of the blood, liver  
450 and spleen indicates that Cu management in the bacterial cell is essential not only for  
451 efficient survival of the bacteria in the bloodstream but also for colonization of highly  
452 immunologically active tissues; *i.e.*, Kupffer cells and splenic lymphocytes for innate and  
453 adaptive immune responses, respectively. It would be of interest to analyze the effect of  
454 Cu transport deficiency in GBS in other relevant models of infection, including in vaginal  
455 colonization (58). Additional to defining the effects of metal homeostasis in GBS on the  
456 nature of infection and disease caused by this organism, small-molecules probes might  
457 hold promise for the identification of other molecular mechanisms of metal homeostasis  
458 in GBS, as reported for Gram-positive bacteria (59).

459

460 In summary, this study shows that management of Cu export in GBS is essential for the  
461 bacteria to survive in environments of Cu stress. Cu intoxication in GBS generates a  
462 transcriptional signature that includes activation of the *cop* operon to confer bacterial  
463 survival and virulence in stressful environments. The exact role for Cu ions as an  
464 antibacterial response against GBS warrants further investigation.

465

466 **Acknowledgements**

467 We thank Michael Crowley and David Crossman of the Heflin Centre for Genomic  
468 Science Core Laboratories, University of Alabama at Birmingham (Birmingham, AL) for  
469 RNA sequencing. We also thank Ryan Stewart at the School of Environment Analytical  
470 Chemistry Core Facility, Griffith University, for ICP-OES. This work was supported by a  
471 Project Grant from the National Health and Medical Research Council (NHMRC)  
472 Australia (APP1146820 to GCU).  
473



474 **References**

- 475 1. Waldron KJ, Rutherford JC, Ford D, Robinson NJ. 2009. Metalloproteins and  
476 metal sensing. *Nature* 460:823-30.
- 477 2. Irving H, Williams RJP. 1953. 637. The stability of transition-metal complexes.  
478 *Journal of the Chemical Society (Resumed)* doi:10.1039/jr9530003192:3192-  
479 3210.
- 480 3. Festa RA, Thiele DJ. 2011. Copper: an essential metal in biology. *Curr Biol*  
481 21:R877-83.
- 482 4. Ladomersky E, Petris MJ. 2015. Copper tolerance and virulence in bacteria.  
483 *Metallomics* 7:957-64.
- 484 5. Djoko KY, Ong CL, Walker MJ, McEwan AG. 2015. The Role of Copper and Zinc  
485 Toxicity in Innate Immune Defense against Bacterial Pathogens. *J Biol Chem*  
486 290:18954-61.
- 487 6. White C, Lee J, Kambe T, Fritsche K, Petris MJ. 2009. A role for the ATP7A  
488 copper-transporting ATPase in macrophage bactericidal activity. *J Biol Chem*  
489 284:33949-56.
- 490 7. Achard Maud ES, Stafford Sian L, Bokil Nilesh J, Chartres J, Bernhardt Paul V,  
491 Schembri Mark A, Sweet Matthew J, McEwan Alastair G. 2012. Copper  
492 redistribution in murine macrophages in response to *Salmonella* infection.  
493 *Biochem J* 444:51-57.
- 494 8. Ladomersky E, Khan A, Shanbhag V, Cavet JS, Chan J, Weisman GA, Petris  
495 MJ. 2017. Host and Pathogen Copper-Transporting P-Type ATPases Function  
496 Antagonistically during *Salmonella* Infection. *Infect Immun* 85.

- 497 9. Johnson MD, Kehl-Fie TE, Klein R, Kelly J, Burnham C, Mann B, Rosch JW.  
498 2015. Role of copper efflux in pneumococcal pathogenesis and resistance to  
499 macrophage-mediated immune clearance. *Infect Immun* 83:1684-94.
- 500 10. Giachino A, Waldron KJ. 2020. Copper tolerance in bacteria requires the  
501 activation of multiple accessory pathways. *Mol Microbiol* 114:377-390.
- 502 11. Rensing C, Fan B, Sharma R, Mitra B, Rosen BP. 2000. CopA: An *Escherichia*  
503 *coli* Cu(I)-translocating P-type ATPase. *Proc Natl Acad Sci U S A* 97:652-6.
- 504 12. Djoko KY, Franiek JA, Edwards JL, Falsetta ML, Kidd SP, Potter AJ, Chen NH,  
505 Apicella MA, Jennings MP, McEwan AG. 2012. Phenotypic characterization of a  
506 copA mutant of *Neisseria gonorrhoeae* identifies a link between copper and  
507 nitrosative stress. *Infect Immun* 80:1065-71.
- 508 13. Solioz M, Stoyanov JV. 2003. Copper homeostasis in *Enterococcus hirae*. *FEMS*  
509 *Microbiol Rev* 27:183-95.
- 510 14. Johnson MD, Kehl-Fie TE, Rosch JW. 2015. Copper intoxication inhibits aerobic  
511 nucleotide synthesis in *Streptococcus pneumoniae*. *Metallomics* 7:786-94.
- 512 15. Stewart LJ, Ong CY, Zhang MM, Brouwer S, McIntyre L, Davies MR, Walker MJ,  
513 McEwan AG, Waldron KJ, Djoko KY. 2020. Role of Glutathione in Buffering  
514 Excess Intracellular Copper in *Streptococcus pyogenes*. *mBio* 11.
- 515 16. Shafeeq S, Yesilkaya H, Kloosterman TG, Narayanan G, Wandel M, Andrew  
516 PW, Kuipers OP, Morrissey JA. 2011. The cop operon is required for copper  
517 homeostasis and contributes to virulence in *Streptococcus pneumoniae*. *Mol*  
518 *Microbiol* 81:1255-70.

- 519 17. Facklam R. 2002. What happened to the streptococci: overview of taxonomic and  
520 nomenclature changes. Clin Microbiol Rev 15:613-30.
- 521 18. Chen SL. 2019. Genomic Insights Into the Distribution and Evolution of Group B  
522 Streptococcus. Frontiers in Microbiology 10:1447.
- 523 19. Edwards MS, Baker CJ. 2018. 119 - *Streptococcus agalactiae* (Group B  
524 *Streptococcus*), p 723-729.e1. In Long SS, Prober CG, Fischer M (ed), Principles  
525 and Practice of Pediatric Infectious Diseases (Fifth Edition)  
526 doi:<https://doi.org/10.1016/B978-0-323-40181-4.00119-5>. Elsevier.
- 527 20. Lindahl G, Stalhammar-Carlemalm M, Areschoug T. 2005. Surface proteins of  
528 *Streptococcus agalactiae* and related proteins in other bacterial pathogens. Clin  
529 Microbiol Rev 18:102-27.
- 530 21. Tuomanen E, Cozens R, Tosch W, Zak O, Tomasz A. 1986. The rate of killing of  
531 *Escherichia coli* by beta-lactam antibiotics is strictly proportional to the rate of  
532 bacterial growth. J Gen Microbiol 132:1297-304.
- 533 22. Eng RH, Padberg FT, Smith SM, Tan EN, Cherubin CE. 1991. Bactericidal  
534 effects of antibiotics on slowly growing and nongrowing bacteria. Antimicrob  
535 Agents Chemother 35:1824-8.
- 536 23. Sanders S, Bartee D, Harrison MJ, Phillips PD, Koppisch AT, Freel Meyers CL.  
537 2018. Growth medium-dependent antimicrobial activity of early stage MEP  
538 pathway inhibitors. PLoS ONE 13:e0197638.
- 539 24. Peterson LR, Gerding DN, Hall WH, Schierl EA. 1978. Medium-dependent  
540 variation in bactericidal activity of antibiotics against susceptible *Staphylococcus*  
541 *aureus*. Antimicrob Agents Chemother 13:665-8.

- 542 25. Sullivan MJ, Ulett GC. 2020. Evaluation of hematogenous spread and ascending  
543 infection in the pathogenesis of acute pyelonephritis due to group B  
544 streptococcus in mice. *Microb Pathog* 138:103796.
- 545 26. Moulin P, Patron K, Cano C, Zorgani MA, Camiade E, Borezee-Durant E,  
546 Rosenau A, Mereghetti L, Hiron A. 2016. The Adc/Lmb System Mediates Zinc  
547 Acquisition in *Streptococcus agalactiae* and Contributes to Bacterial Growth and  
548 Survival. *J Bacteriol* 198:3265-3277.
- 549 27. Sullivan MJ, Ulett GC. 2018. Stable Expression of Modified Green Fluorescent  
550 Protein in Group B Streptococci To Enable Visualization in Experimental  
551 Systems. *Appl Environ Microbiol* 84.
- 552 28. Ipe DS, Ben Zakour NL, Sullivan MJ, Beatson SA, Ulett KB, Benjamin WHJ,  
553 Davies MR, Dando SJ, King NP, Cripps AW, Schembri MA, Dougan G, Ulett GC.  
554 2015. Discovery and Characterization of Human-Urine Utilization by  
555 Asymptomatic-Bacteriuria-Causing *Streptococcus agalactiae*. *Infect Immun*  
556 84:307-19.
- 557 29. Sullivan MJ, Leclercq SY, Ipe DS, Carey AJ, Smith JP, Voller N, Cripps AW, Ulett  
558 GC. 2017. Effect of the *Streptococcus agalactiae* Virulence Regulator CovR on  
559 the Pathogenesis of Urinary Tract Infection. *J Infect Dis* 215:475-483.
- 560 30. Untergasser A, Cutcutache I, Koressaar T, Ye J, Faircloth BC, Remm M, Rozen  
561 SG. 2012. Primer3--new capabilities and interfaces. *Nucleic Acids Res* 40:e115.
- 562 31. Untergasser A, Nijveen H, Rao X, Bisseling T, Geurts R, Leunissen JA. 2007.  
563 Primer3Plus, an enhanced web interface to Primer3. *Nucleic Acids Res* 35:W71-  
564 4.

- 565 32. Bustin SA, Benes V, Garson JA, Hellemans J, Huggett J, Kubista M, Mueller R,  
566 Nolan T, Pfaffl MW, Shipley GL, Vandesompele J, Wittwer CT. 2009. The MIQE  
567 guidelines: minimum information for publication of quantitative real-time PCR  
568 experiments. *Clin Chem* 55:611-22.
- 569 33. Sullivan MJ, Forde BM, Prince DW, Ipe DS, Ben Zakour NL, Davies MR, Dougan  
570 G, Beatson SA, Ulett GC. 2017. Complete Genome Sequence of Serotype III  
571 *Streptococcus agalactiae* Sequence Type 17 Strain 874391. *Genome*  
572 *Announcements* 5.
- 573 34. Pfaffl MW. 2001. A new mathematical model for relative quantification in real-  
574 time RT-PCR. *Nucleic Acids Res* 29:e45.
- 575 35. Eijkelkamp BA, Morey JR, Ween MP, Ong CL, McEwan AG, Paton JC, McDevitt  
576 CA. 2014. Extracellular zinc competitively inhibits manganese uptake and  
577 compromises oxidative stress management in *Streptococcus pneumoniae*. *PLoS*  
578 *ONE* 9:e89427.
- 579 36. Anders S, Pyl PT, Huber W. 2015. HTSeq--a Python framework to work with  
580 high-throughput sequencing data. *Bioinformatics* 31:166-9.
- 581 37. Love MI, Huber W, Anders S. 2014. Moderated estimation of fold change and  
582 dispersion for RNA-seq data with DESeq2. *Genome Biol* 15:550.
- 583 38. Acharya D, Sullivan MJ, Duell BL, Goh KGK, Katupitiya L, Gosling D, Chamoun  
584 MN, Kakkanat A, Chattopadhyay D, Crowley M, Crossman DK, Schembri MA,  
585 Ulett GC. 2019. Rapid Bladder Interleukin-10 Synthesis in Response to  
586 Uropathogenic *Escherichia coli* Is Part of a Defense Strategy Triggered by the  
587 Major Bacterial Flagellar Filament FliC and Contingent on TLR5. *mSphere* 4.

- 588 39. Leclercq SY, Sullivan MJ, Ipe DS, Smith JP, Cripps AW, Ulett GC. 2016.  
589 Pathogenesis of *Streptococcus* urinary tract infection depends on bacterial strain  
590 and beta-hemolysin/cytolysin that mediates cytotoxicity, cytokine synthesis,  
591 inflammation and virulence. *Scientific Reports* 6:29000.
- 592 40. Valdes Lopez JF, Urcuqui-Inchima S. 2018. Synergism between phorbol-12-  
593 myristate-13-acetate and vitamin D3 in the differentiation of U937 cells to  
594 monocytes and macrophages. *Morphologie* 102:205-218.
- 595 41. Cumley NJ, Smith LM, Anthony M, May RC. 2012. The CovS/CovR acid  
596 response regulator is required for intracellular survival of group B *Streptococcus*  
597 in macrophages. *Infect Immun* 80:1650-61.
- 598 42. Price EE, Boyd JM. 2020. Genetic Regulation of Metal Ion Homeostasis in  
599 *Staphylococcus aureus*. *Trends Microbiol* 28:821-831.
- 600 43. Turner AG, Djoko KY, Ong CY, Barnett TC, Walker MJ, McEwan AG. 2019.  
601 Group A *Streptococcus* co-ordinates manganese import and iron efflux in  
602 response to hydrogen peroxide stress. *Biochem J* 476:595-611.
- 603 44. Janulczyk R, Ricci S, Bjorck L. 2003. MtsABC is important for manganese and  
604 iron transport, oxidative stress resistance, and virulence of *Streptococcus*  
605 *pyogenes*. *Infect Immun* 71:2656-64.
- 606 45. Culbertson EM, Bruno VM, Cormack BP, Culotta VC. 2020. Expanded role of the  
607 Cu-sensing transcription factor Mac1p in *Candida albicans*. *Mol Microbiol*  
608 114:1006-1018.

- 609 46. Shabayek S, Bauer R, Mauerer S, Mizaikoff B, Spellerberg B. 2016. A  
610 streptococcal NRAMP homologue is crucial for the survival of *Streptococcus*  
611 *agalactiae* under low pH conditions. Mol Microbiol 100:589-606.
- 612 47. Sullivan MJ, Goh KG, Ulett GC. 2021. Cellular management of Zinc in group B  
613 *Streptococcus* supports bacterial resistance against metal intoxication and  
614 promotes disseminated infection. bioRxiv:2021.02.05.42539.
- 615 48. Hood MI, Skaar EP. 2012. Nutritional immunity: transition metals at the  
616 pathogen-host interface. Nat Rev Microbiol 10:525-37.
- 617 49. Ong CY, Berking O, Walker MJ, McEwan AG. 2018. New Insights into the Role  
618 of Zinc Acquisition and Zinc Tolerance in Group A Streptococcal Infection. Infect  
619 Immun 86.
- 620 50. Odermatt A, Solioz M. 1995. Two trans-acting metalloregulatory proteins  
621 controlling expression of the copper-ATPases of *Enterococcus hirae*. J Biol  
622 Chem 270:4349-54.
- 623 51. Portmann R, Poulsen KR, Wimmer R, Solioz M. 2006. CopY-like copper  
624 inducible repressors are putative 'winged helix' proteins. Biometals 19:61-70.
- 625 52. Beisel WR, Pekarek RS, Wannemacher RW. 1974. The impact of infectious  
626 disease on trace-element metabolism of the host., p 217. In Hoekstra WG, Suttie  
627 JW, Ganther HE, Mertz W (ed), Trace element metabolism in animals, 2  
628 University Park Press, Baltimore, MD.
- 629 53. Fleming RE, Whitman IP, Gitlin JD. 1991. Induction of ceruloplasmin gene  
630 expression in rat lung during inflammation and hyperoxia. Am J Physiol 260:L68-  
631 74.

- 632 54. Percival SS. 1998. Copper and immunity. *Am J Clin Nutr* 67:1064S-1068S.
- 633 55. Achard ME, Tree JJ, Holden JA, Simpfendorfer KR, Wijburg OL, Strugnell RA,  
634 Schembri MA, Sweet MJ, Jennings MP, McEwan AG. 2010. The multi-copper-ion  
635 oxidase CueO of *Salmonella enterica* serovar Typhimurium is required for  
636 systemic virulence. *Infect Immun* 78:2312-9.
- 637 56. Francis MS, Thomas CJ. 1997. Mutants in the CtpA copper transporting P-type  
638 ATPase reduce virulence of *Listeria monocytogenes*. *Microb Pathog* 22:67-78.
- 639 57. Schwan WR, Warrener P, Keunz E, Stover CK, Folger KR. 2005. Mutations in  
640 the *cueA* gene encoding a copper homeostasis P-type ATPase reduce the  
641 pathogenicity of *Pseudomonas aeruginosa* in mice. *Int J Med Microbiol* 295:237-  
642 42.
- 643 58. Carey AJ, Tan CK, Mirza S, Irving-Rodgers H, Webb RI, Lam A, Ulett GC. 2014.  
644 Infection and cellular defense dynamics in a novel 17beta-estradiol murine model  
645 of chronic human group B streptococcus genital tract colonization reveal a role  
646 for hemolysin in persistence and neutrophil accumulation. *J Immunol* 192:1718-  
647 31.
- 648 59. Juttukonda LJ, Beavers WN, Unsihuay D, Kim K, Pishchany G, Horning KJ,  
649 Weiss A, Al-Tameemi H, Boyd JM, Sulikowski GA, Bowman AB, Skaar EP. 2020.  
650 A Small-Molecule Modulator of Metal Homeostasis in Gram-Positive Pathogens.  
651 *mBio* 11.
- 652 60. Takahashi S, Nagano Y, Nagano N, Hayashi O, Taguchi F, Okuwaki Y. 1995.  
653 Role of C5a-ase in group B streptococcal resistance to opsonophagocytic killing.  
654 *Infect Immun* 63:4764-9.



- 655 61. Neubert MJ, Dahlmann EA, Ambrose A, Johnson MDL. 2017. Copper Chaperone  
656 CupA and Zinc Control CopY Regulation of the Pneumococcal *cop* Operon.  
657 mSphere 2.  
658

659 **TABLE 1. Transcriptional signature of Cu intoxication in GBS**

| Locus_<br>tag <sup>†</sup> | Genbank<br>accession | Label        | Annotation                                                          | FC   | FDR      |
|----------------------------|----------------------|--------------|---------------------------------------------------------------------|------|----------|
| 02565                      | ASZ00809.1           | <i>copY</i>  | CopY/TcrY family copper transport repressor                         | 4.1  | 1.09E-12 |
| 02575                      | ASZ00811.1           | <i>copZ</i>  | carbonate dehydratase                                               | 4.0  | 1.02E-37 |
| 02570                      | ASZ00810.1           | <i>copA</i>  | copper-translocating P-type ATPase                                  | 3.7  | 2.25E-35 |
| 10970                      | ASZ02392.1           |              | peptidoglycan-binding protein LysM                                  | 3.4  | 6.13E-13 |
| 07965                      | ASZ01821.1           | <i>mtsA</i>  | metal ABC transporter substrate-binding protein                     | 2.9  | 2.15E-12 |
| 07960                      | ASZ01820.1           | <i>mtsB</i>  | metal ABC transporter ATP-binding protein                           | 2.6  | 1.02E-15 |
| 10190                      | ASZ02237.1           | <i>mntH2</i> | divalent metal cation transporter                                   | 2.4  | 6.34E-09 |
| 10965                      | ASZ02391.1           |              | transglycosylase                                                    | 2.2  | 1.87E-06 |
| 09125                      | ASZ02032.1           |              | CHAP domain-containing protein                                      | 2.1  | 1.58E-09 |
| 07955                      | ASZ01819.1           | <i>mtsC</i>  | metal ABC transporter permease                                      | 2.1  | 2.62E-10 |
| 10305                      | ASZ02261.1           |              | PAP2 family protein                                                 | 2.0  | 6.13E-13 |
| 08045                      | ASZ01834.1           |              | glycosyltransferase family 2 protein                                | -2.0 | 9.51E-06 |
| 08200                      | ASZ01861.1           |              | branched-chain amino acid ABC transporter substrate-binding protein | -2.3 | 1.98E-04 |
| 10430                      | ASZ02284.1           | <i>hvgA</i>  | pathogenicity protein                                               | -2.3 | 2.18E-07 |
| 04720                      | ASZ01199.1           | <i>pcl1</i>  | membrane protein                                                    | -4.3 | 1.38E-09 |
| 04185                      | ASZ01095.1           | <i>fetB</i>  | iron export ABC transporter permease subunit, FetB                  | -4.9 | 1.39E-08 |
| 04180                      | ASZ01094.1           | <i>fetA</i>  | ABC transporter ATP-binding protein FetA                            | -4.9 | 4.58E-11 |

660 <sup>†</sup> denotes locus tag of *S. agalactiae* 874391, preceded by CHF17\_RS

661 **TABLE 2. Bacterial strains and Plasmids**

| <b>Bacteria</b>             |                                                                                                                                              | 662                    |
|-----------------------------|----------------------------------------------------------------------------------------------------------------------------------------------|------------------------|
| <b>Strains</b>              | <b>Characteristics</b>                                                                                                                       | <b>Source</b>          |
| <i>E. coli</i> DH5 $\alpha$ | <i>huA2 lac(<math>\Delta</math>)U169 phoA glnV44 <math>\Phi</math>80' lacZ(<math>\Delta</math>)M15 gyrA96 recA1 relA1 endA1 thi-1 hsdR17</i> | Bethesda Research Labs |
| <i>S. agalactiae</i> 874391 | Wild type, Sequence type-17, Serotype III strain, Vaginal isolate (Japan)                                                                    | (60)                   |
| <i>S. agalactiae</i> GU2691 | 874391 $\Delta$ <i>copA</i> ( <i>copA</i> <sup>-</sup> mutant)<br>Locus tag: CHF17_RS02570                                                   | This work              |
| <i>S. agalactiae</i> GU2857 | 874391 $\Delta$ <i>copY</i> ( <i>copY</i> mutant)<br>Locus tag: CHF17_RS02565                                                                | This work              |
| <i>S. agalactiae</i> GU3121 | GU2857 ( $\Delta$ <i>copA</i> ) containing <i>copYAZ</i> complement construct pGU3112; Sp                                                    | This work              |
| <b>Plasmids</b>             |                                                                                                                                              |                        |
| pHY304aad9                  | <i>ori</i> (Ts); temperature-sensitive shuttle vector; Sp                                                                                    | (28)                   |
| pGU2650                     | pHY304aad9-derivative <i>copA</i> $\Delta$ construct; Sp                                                                                     | This work              |
| pGU2847                     | pHY304aad9-derivative <i>copY</i> $\Delta$ construct; Sp                                                                                     | This work              |
| pGU3112                     | pDL278 containing cloned <i>copYAZ</i> operon; Sp                                                                                            | This work              |

663 **FIG 1.** Global transcriptomic analysis of GBS in response to Cu stress. Volcano plot  
664 showing data from RNASeq analysis of WT GBS cultures exposed to 0.5 mM Cu  
665 compared to non-exposed controls. Transcripts detected as up- or down-regulated in  
666 response to Cu ( $n=4$ ,  $>\pm 2$ -fold, FDR  $<0.05$ ) are highlighted in red and blue,  
667 respectively. Dotted lines show False discovery rate (FDR; q-value) and fold-change  
668 cut-offs. Grey points indicate genes that were not significant changed in expression,  
669 according to these analysis cut-offs. Selected genes are identified with black lines. B,  
670 Validation of RNASeq data. Expression ratio (Fold-change) of *pcl1*, *hvgA* and *copY*  
671 quantified by qRTPCR in THB medium containing 0.5 mM Cu compared to THB without  
672 Cu. Ratios for qRTPCR were normalized using housekeeping *dnaN* and RNASeq ratios  
673 were calculated using DESeq2. Bars show means and S.E.M from 4 independent  
674 experiments.

675  
676 **FIG 2.** Organisation of the *copY-copA-copZ* locus in GBS. A, *copY-copA-copZ* are  
677 adjacent in the GBS genome and likely controlled by the promoter-proximal *copY*,  
678 encoding a putative Cu-sensing repressor. Locus tags from the GBS 874391 genome  
679 are indicated. B, Distribution of homologous *cop* genes in other Lactobacillales,  
680 arranged by percentage identity of amino acid sequence to CopA of *S. agalactiae*. C,  
681 Model of Cu efflux in GBS highlighting CopA as transmembrane Cu exporter,  
682 transcriptionally repressed by CopY in the absence of Cu, which is likely inhibited by the  
683 Cu-binding chaperone protein CopZ. Figure based on previous studies in other  
684 lactobacillales (51, 61).

685 **FIG 3.** Growth curve analyses of GBS cultured in nutrient-rich THB medium (A), or in  
686 THB supplemented with 0.5 mM Cu (B), 1.0 mM Cu (C) or 1.5 mM Cu (D), comparing  
687 WT,  $\Delta copA$  or  $\Delta copY$  strains as indicated in panel A. Points and bars show mean and  
688 S.E.M of 3 independent experiments monitoring attenuation at 600nm.

689

690 **FIG 4.** Bactericidal effect of Cu on GBS viability. Time-kill assays comparing WT,  $\Delta copA$   
691 or  $\Delta copY$  GBS, incubated in CDM or in CDM supplemented with 0.05, 0.1, 0.2, 0.5 or 1  
692 mM Cu. Viable cells were quantified at 1h, 3h, 6h and 24h post inoculation. <sup>†</sup> Viable Cell  
693 counts of 0 CFU/mL were assigned a value of 1 to enable visualisation on log<sub>10</sub> y-axes.  
694 Points and bars show mean and S.E.M of 4 independent experiments. Data were  
695 analysed by One-way ANOVA with Holm Sidak Multiple comparisons, comparing Cu-  
696 exposed conditions to non-exposed controls (0 mM Cu) at each time-point, for each  
697 strain (\* P < 0.05, \*\* P < 0.01. \*\*\* P < 0.001).

698

699 **FIG 5.** Expression analysis of *copA* and intracellular Cu content in GBS strains. A,  
700 Expression ratio (Fold-change) of *copA* quantified by qRT-PCR in THB medium  
701 containing 0.25, 0.5, 1.0 and 1.5 mM Cu, compared to THB without Cu. B, Relative  
702 *copA* transcripts were quantified in WT and  $\Delta copY$  strains with and without Cu  
703 supplementation (0.5 mM) to demonstrate de-regulation of *copA* expression in the  
704  $\Delta copY$  background. C, Final biomass yield comparisons of WT,  $\Delta copA$  and  $\Delta copY$   
705 strains following growth for 18h in THB with 1.5 mM Cu. D, Intracellular accumulation of  
706 Cu was compared with and without Cu supplementation (0.5 mM) in WT,  $\Delta copA$  and  
707  $\Delta copY$  strains. Ratios in A were calculated as described previously (34) using C<sub>T</sub>

708 values, primer efficiencies and housekeeping *dnaN*. Bars show means and S.E.M from  
709 3-4 independent experiments and compared by One-way ANOVA with Holm-Sidak  
710 multiple comparisons (\*\**P* < 0.001).

711  
712 **FIG 6.** Interactions of GBS with macrophages of mouse and human origin. Gentamicin  
713 protection assays with WT and  $\Delta copA$  strains and mouse (J774A.1) or human (U937  
714 monocyte-derived macrophage-like) macrophages. Surviving bacteria are expressed as  
715 rCFU, indicating the difference between the number of initial intracellular bacteria (1h  
716 after antibiotic treatment) and the number of intracellular bacteria at 24h or 48h post  
717 infection (h.p.i). Data are means and S.E.M of 4-5 independent experiments.

718  
719 **FIG 7.** Virulence of WT (grey circles) or  $\Delta copA$  (blue diamonds) GBS (orange triangles)  
720 in a mouse model of disseminated infection. C57BL/6 mice (6-8 weeks old) were  
721 intravenously injected with  $10^7$  bacteria; bacteremia and disseminated spread to liver  
722 and spleen were monitored at 24h post infection. CFU were enumerated and counts  
723 were normalized using tissue mass in g. Lines and bars show median and interquartile  
724 ranges and data are pooled from 2 independent experiments each containing n=10  
725 mice compared using Mann-Whitney U-tests (\**P* < 0.05, \*\**P* < 0.01).

726  
727 **Supplementary FIG S1.** Complementation of *copA* mutation restores growth of GBS to  
728 WT levels under Cu stress. Growth curve analyses of GBS cultured in nutrient-rich THB  
729 medium (A), or in THB supplemented with 0.5 mM Cu (B), 1.0 mM Cu (C) or 1.5 mM Cu  
730 (D), comparing WT,  $\Delta copA::copA$  strains.

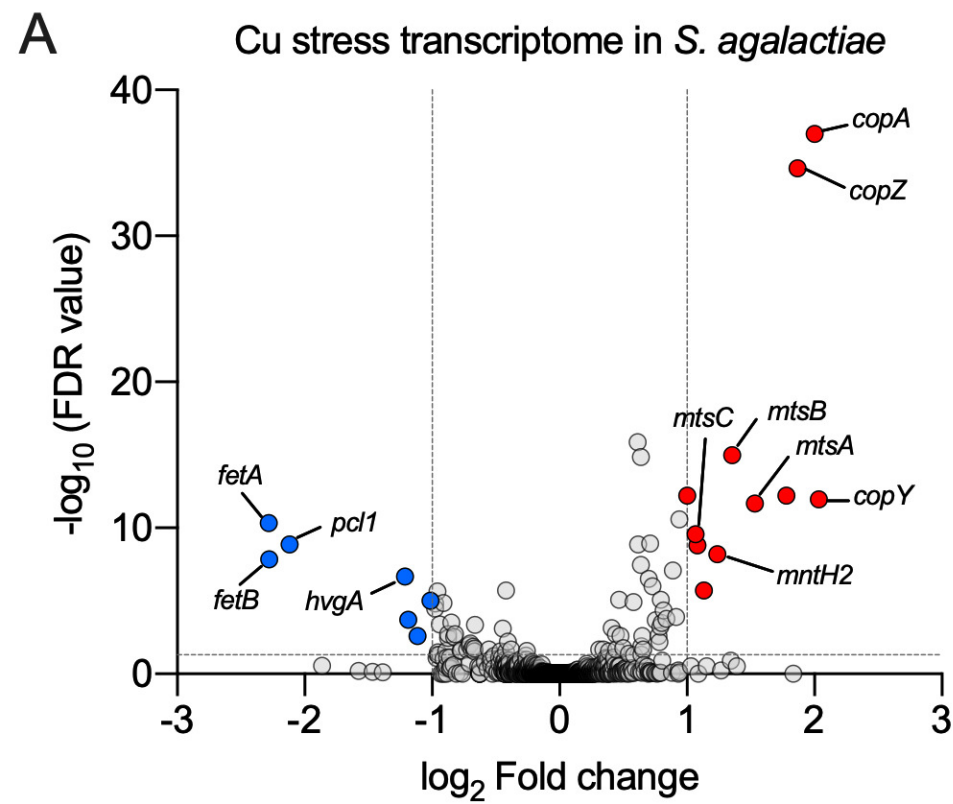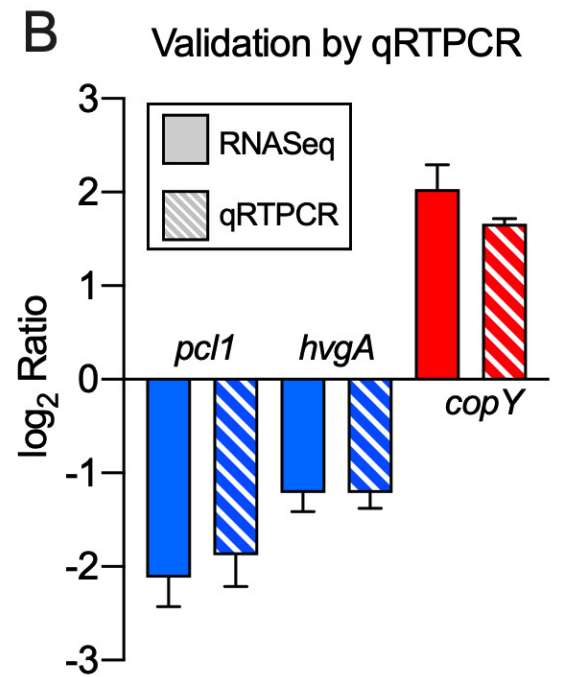

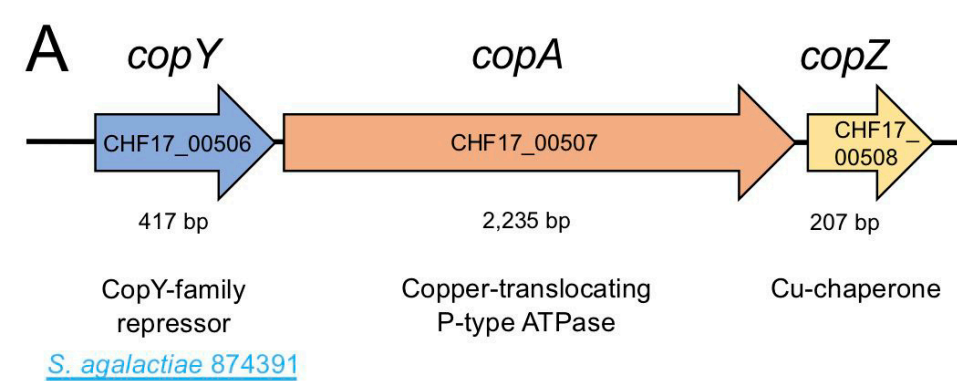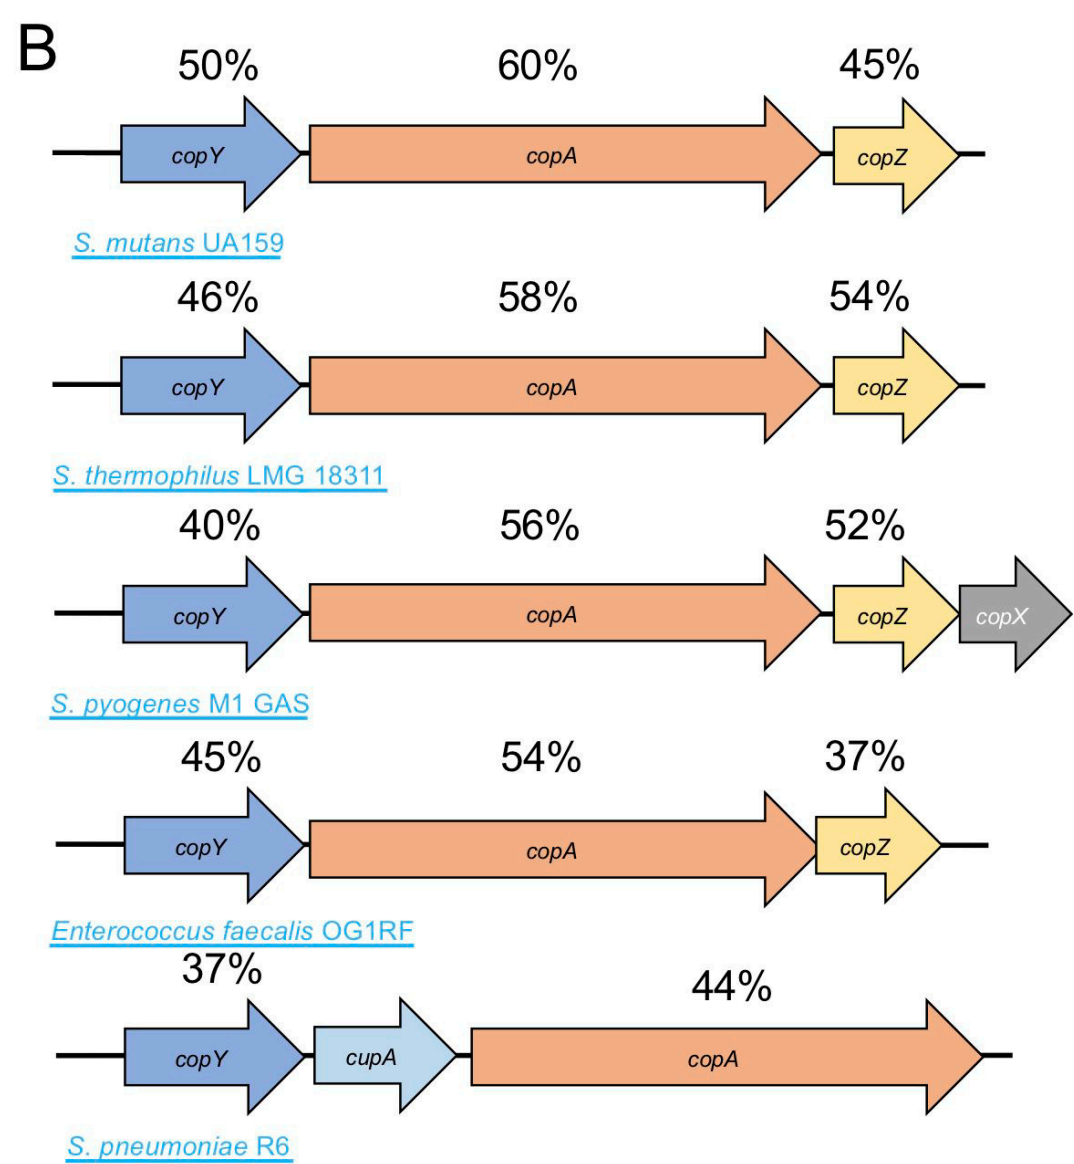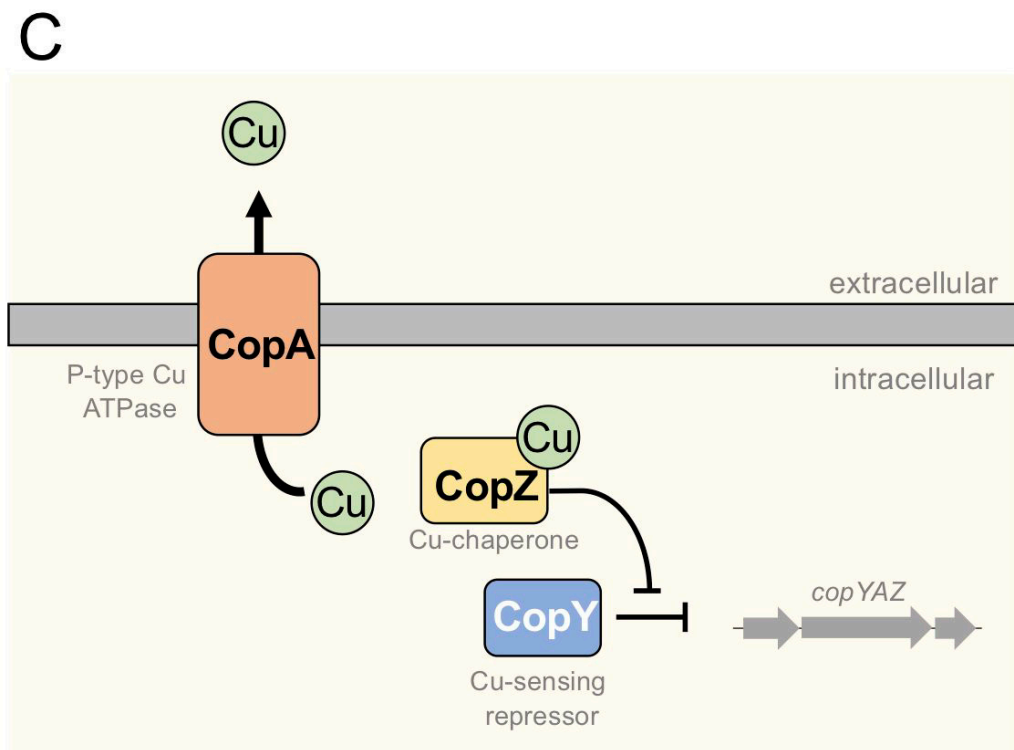



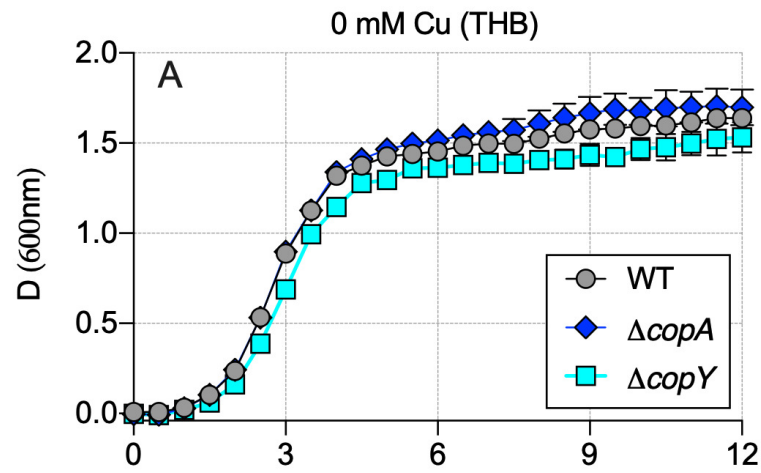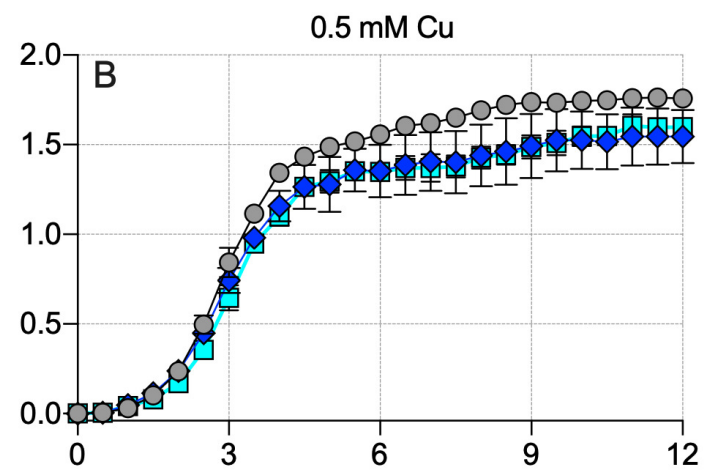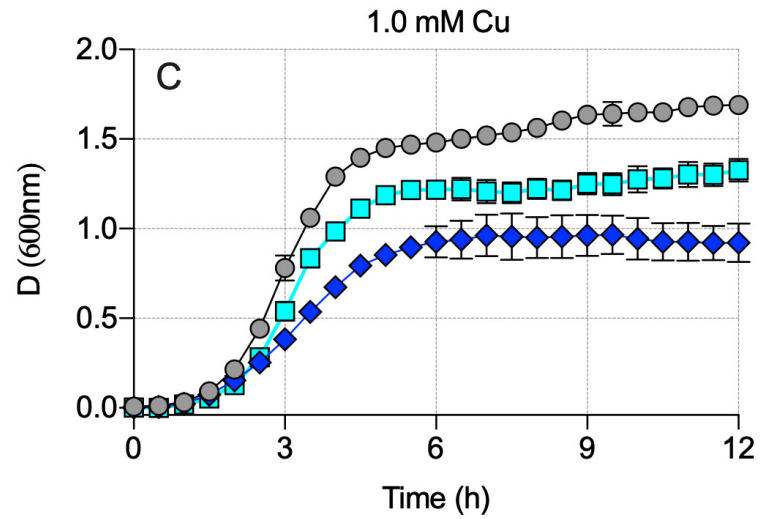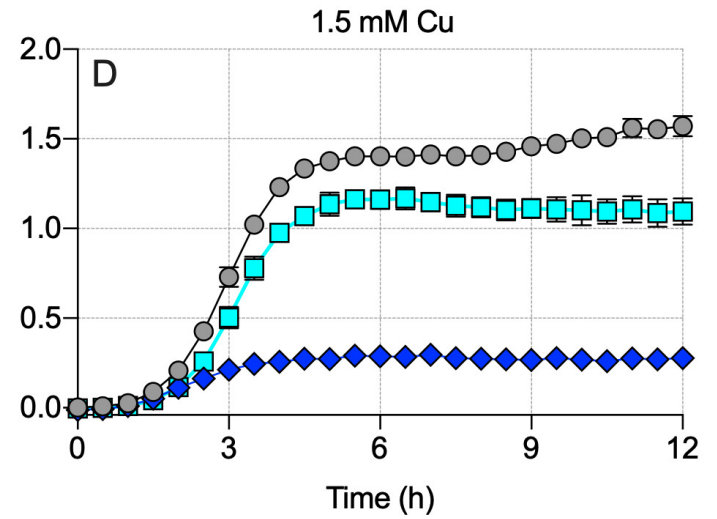

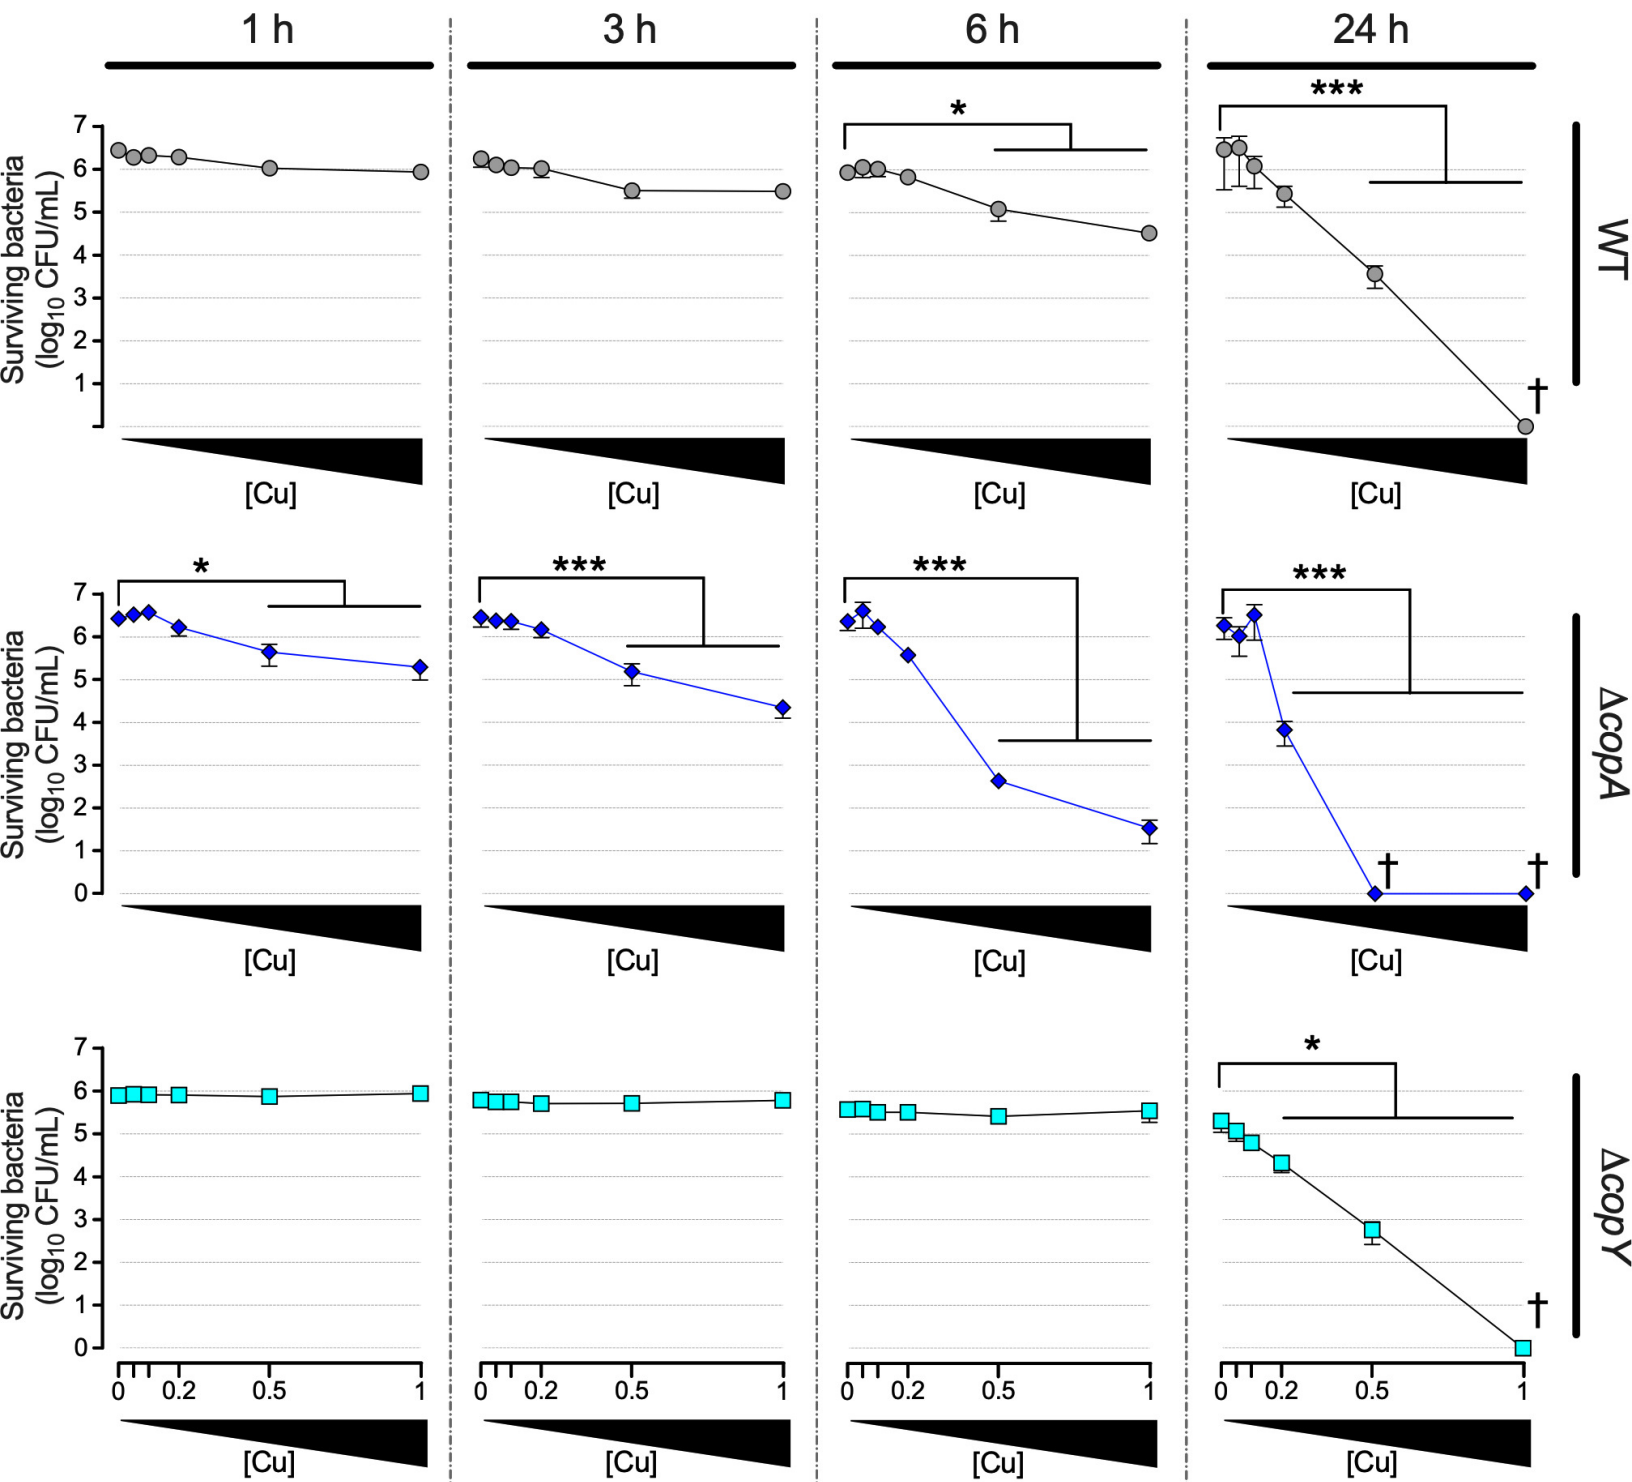

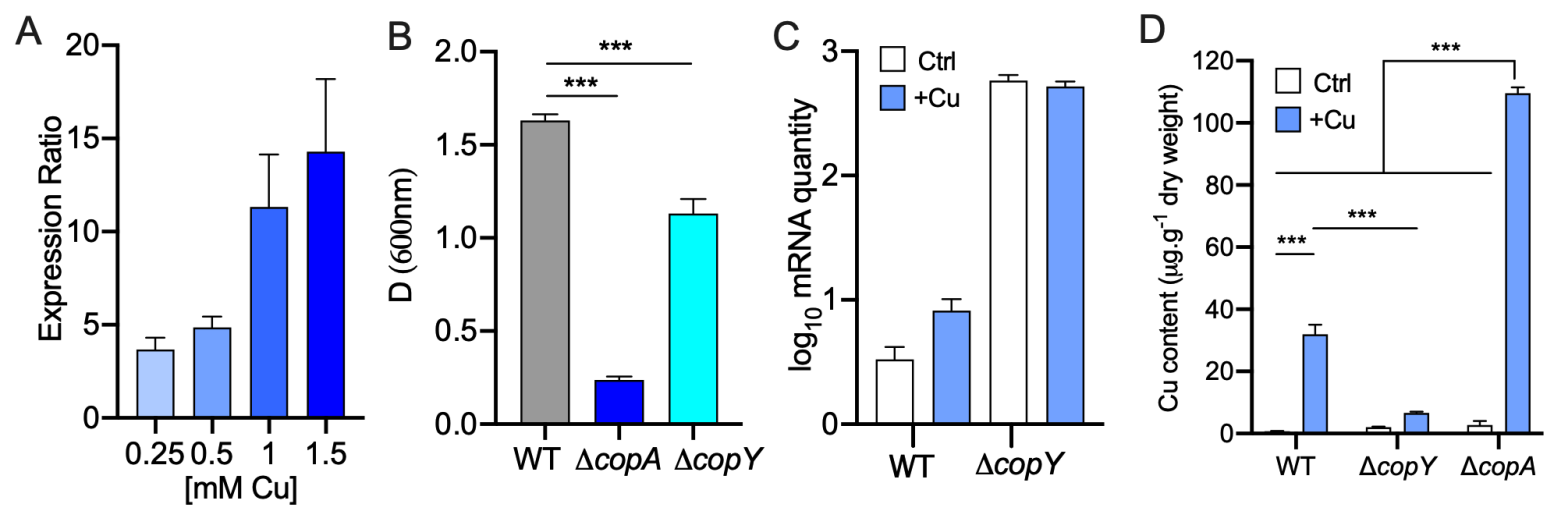

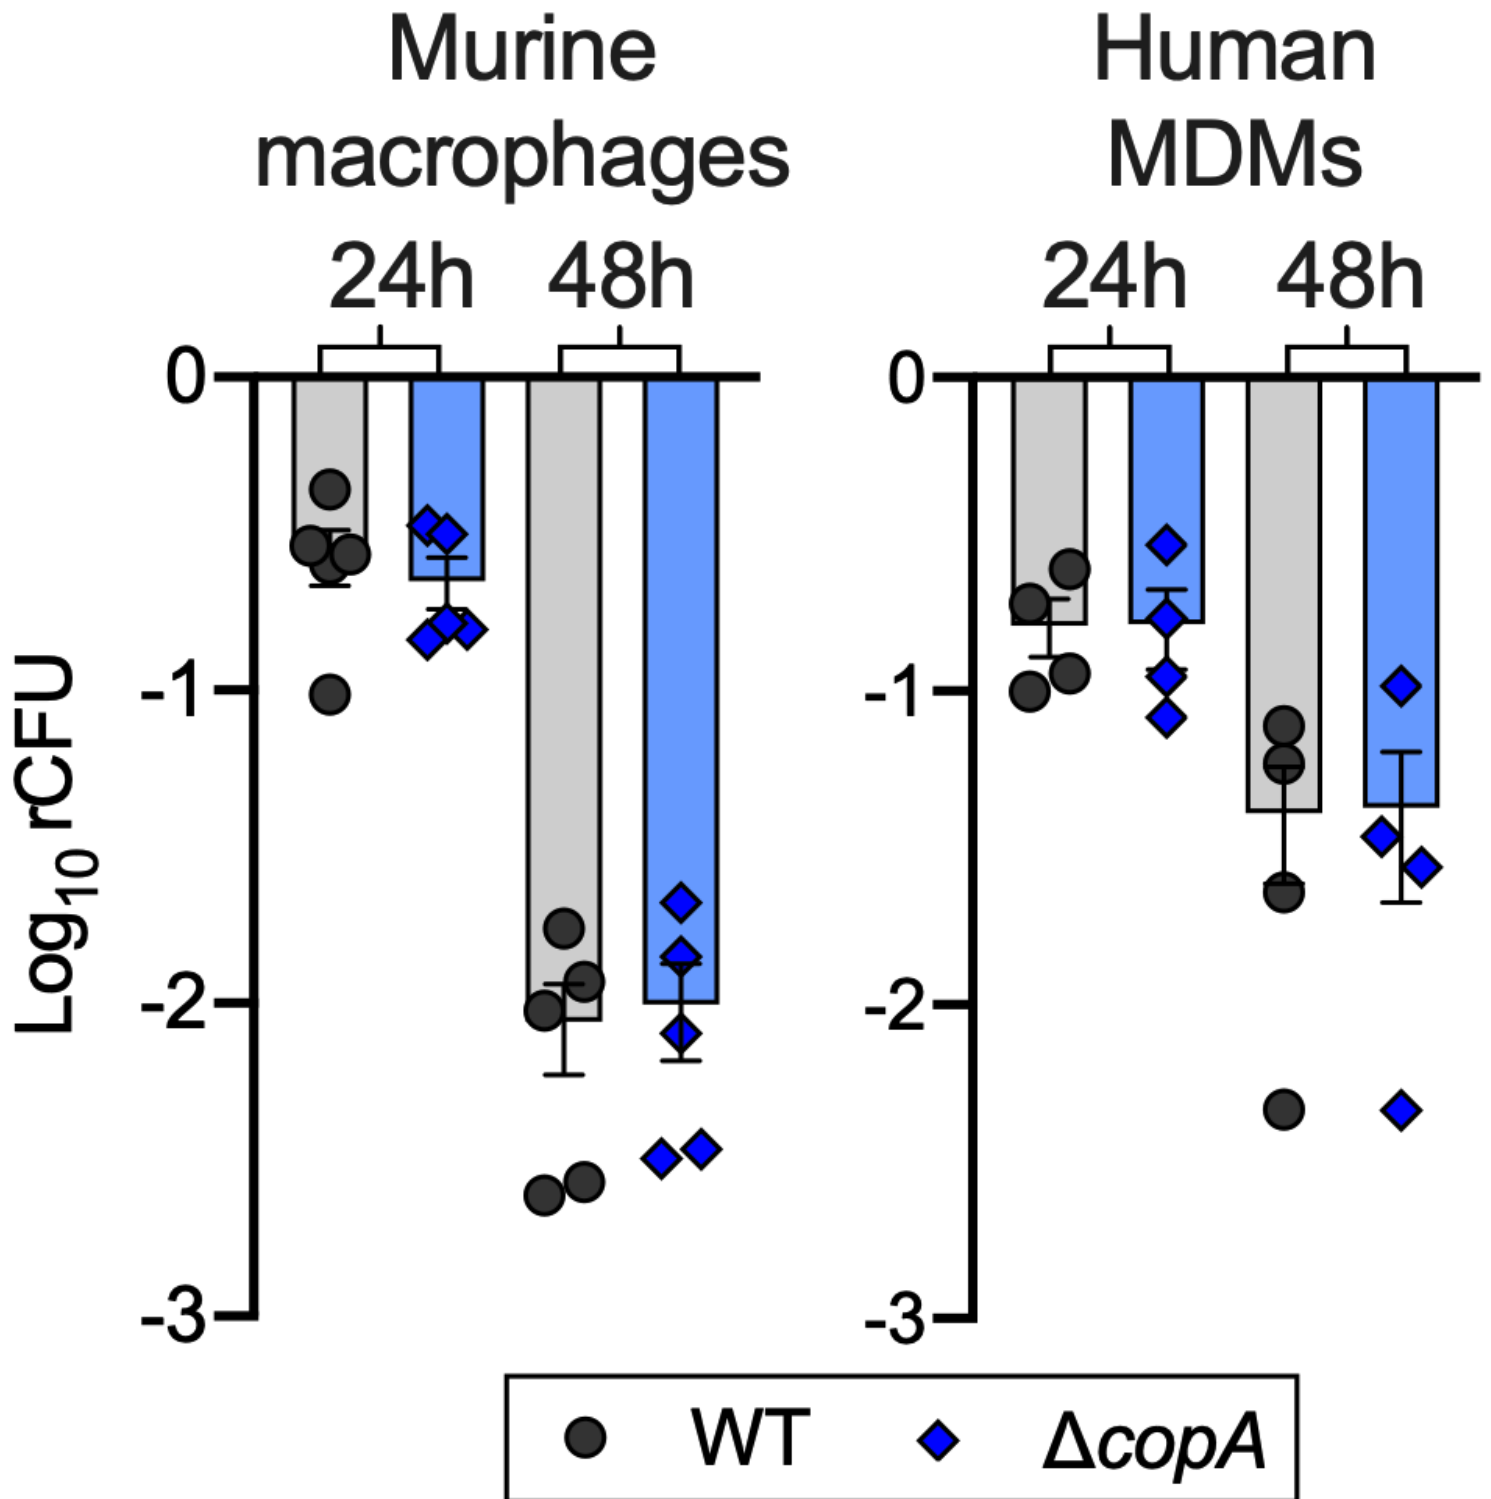

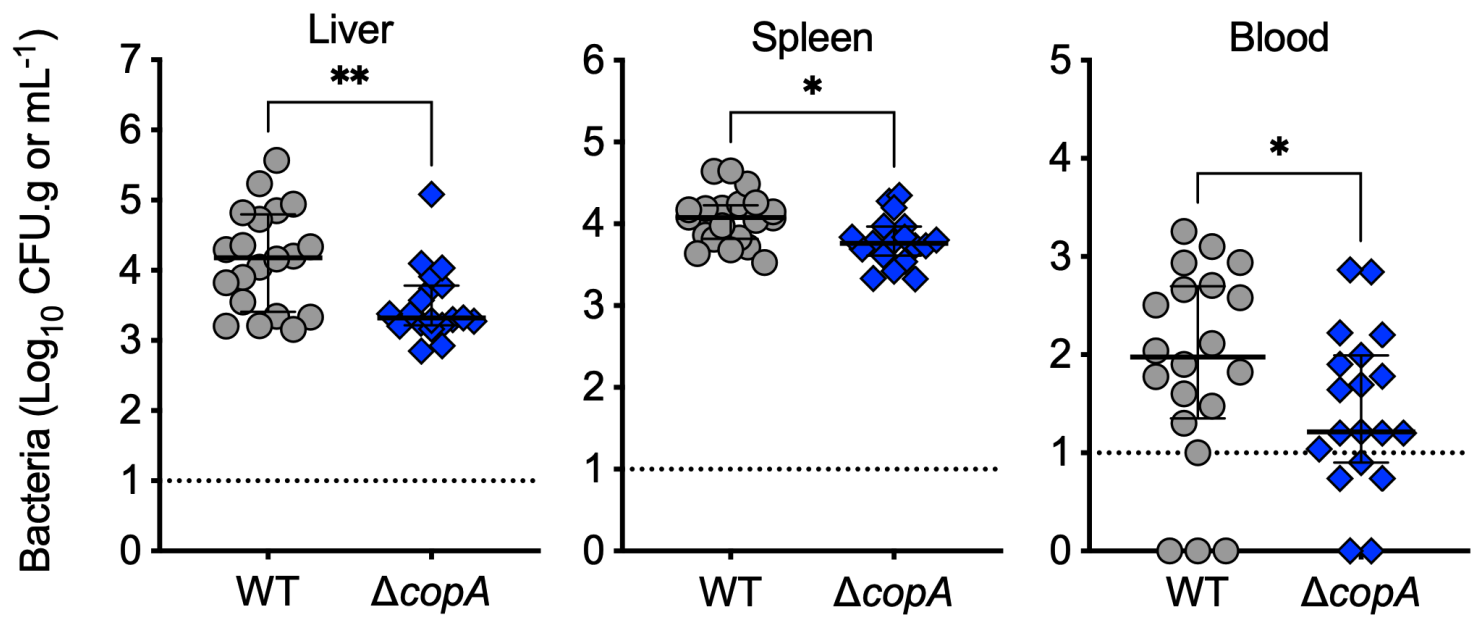

Source: https://www.biorxiv.org/content/10.1101/2021.03.25.437115v1.full.pdf
